# Supplementary material
Source: publisher site journal article supplement (https://www.degruyterbrill.com/publication/journal_key/HTMP/downloadAsset/HTMP_ICAMIM_conf.pdf)
Supplement: Supplementary file 1 [file HTMP_ICAMIM_conf.pdf]

# Topical Issue in High Temperature Materials and Processes: The 5th International Conference on Advanced Materials and Intelligent Manufacturing

## GUEST EDITORS

### **Prof. Dr. Zhi Wang**

South China University of Technology

[wangzhi@scut.edu.cn](mailto:wangzhi@scut.edu.cn)

### **Prof. Dr. Tongguang Zhai**

University of Kentucky & Shandong Jianzhu University

[tongguang.zhai@uky.edu](mailto:tongguang.zhai@uky.edu)

### **Prof. Dr. Liejun Li**

South China University of Technology

[Liliejun@scut.edu.cn](mailto:Liliejun@scut.edu.cn); [422959636@qq.com](mailto:422959636@qq.com)

### **Prof. Dr. Ali Kamali**

Northeastern University

[ali@smm.neu.edu.cn](mailto:ali@smm.neu.edu.cn); [a.r.kamali@cantab.net](mailto:a.r.kamali@cantab.net); [kamalia@bournemouth.ac.uk](mailto:kamalia@bournemouth.ac.uk)

The 5th International Conference on Advanced Materials and Intelligent Manufacturing (ICAMIM 2024) will be held on November 15-17, 2024 in Guangzhou, China. It aims to provide a high-level technical exchange platform to innovations in the field of advanced materials and intelligent manufacturing for worldwide experts.

Link to conference: [icamim.org](http://icamim.org)

## TOPIC AND SCOPE

As the precursor for the emerging strategic emerging industries, advanced materials have become the key focus and core technology of international competition. Meanwhile, the development of advanced materials and their corresponding technologies and industries has also being regarded as national development strategy for the world's leading countries and gradually developed into a new "trump card" in the game between countries.

ICAMIM 2024 aims to provide a high-level technical exchange platform for global experts, scholars, scientific workers, and other relevant personnel engaging in advanced materials and intelligent manufacturing research. Original research articles, and review articles are warmly welcomed to submit.

The preferred topic areas are as follows:

- Advanced materials,
- Intelligent manufacturing.

## HOW TO SUBMIT

**Deadline: February 28th 2025**

**Estimated number of manuscripts: 15-20 papers**

Before submission authors should carefully read the [Instruction for Authors](#). In order to make the preparation of manuscript easier, you are advised to use the [Manuscript Template](#).

All submissions to the Topical Issue must be made electronically via the [Editorial Manager submission and tracking review system](#). When entering your submission via online submission system please choose "The 5th International Conference on Advanced Materials and Intelligent Manufacturing". All manuscripts will undergo the standard peer-review process (single-blind, at least two independent reviewers).

The deadline for submissions is February 28th 2025, but individual papers will be reviewed and published online on an ongoing basis.

Participants of The 5th International Conference on Advanced Materials and Intelligent Manufacturing can obtain a 50% discount on an APC fee.

In case of any question please contact Ms. Joanna Kosińska, Managing Editor of High Temperature Materials and Processes, [Joanna.Kosinska@degruyter.com](mailto:Joanna.Kosinska@degruyter.com)
